# Supplementary material for: The Impact of Gold Nanoparticles on Somatic Embryogenesis Using the Example of Arabidopsis thaliana
Source: MDPI journal article supplement (doi:10.3390/ijms241210356), 2023-06-19
Supplement: s1 [file s1]

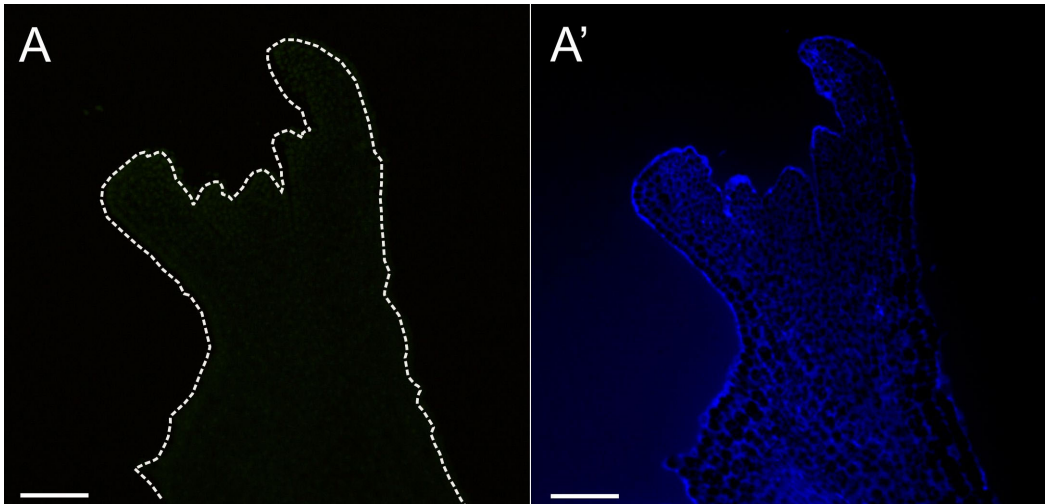

**Figure S1.** A- negative control of BPEI Au NPs-treated explant and the same section from A staining with calcofluor. Scale bars—200  $\mu\text{m}$ .
